# Supplementary material for: Perioperative Outcomes in Primary Neonatal Pullthrough versus Pullthrough in Older Children: A Systematic Review and Meta-analysis
Source: Research Square preprint supplement (doi:10.21203/rs.3.rs-7387957/v1), 2025-09-26
Supplement: Supplementary file 2 [file b2f73e7b0a1de97d2e38f697.docx]

**APPENDIX**: ***search updated on Jun 29, 2022***

Final PubMed search

("child*"[Title/Abstract] OR "stepchild*"[Title/Abstract] OR "step child*"[Title/Abstract] OR "kid"[Title/Abstract] OR "kids"[Title/Abstract] OR "girl"[Title/Abstract] OR "girls"[Title/Abstract] OR "boy"[Title/Abstract] OR "boys"[Title/Abstract] OR "boyhood"[Title/Abstract] OR "youngster*"[Title/Abstract] OR "toddler*"[Title/Abstract] OR "preschool*"[Title/Abstract] OR "pre school*"[Title/Abstract]OR "kindergarten*"[Title/Abstract] OR "juvenil*"[Title/Abstract] OR "minors"[Title/Abstract] OR "minors*"[Title/Abstract] OR "pediatric*"[Title/Abstract] OR "paediatric*"[Title/Abstract] OR "PICU"[Title/Abstract] OR "baby"[Title/Abstract] OR "baby*"[Title/Abstract] OR "babies"[Title/Abstract] OR "neonat*"[Title/Abstract] OR "neo nat*"[Title/Abstract] OR "perinat*"[Title/Abstract] OR "peri nat*"[Title/Abstract] OR "newborn*"[Title/Abstract] OR "new born*"[Title/Abstract] OR "infan*"[Title/Abstract] OR "premature*"[Title/Abstract] OR "preterm*"[Title/Abstract] OR "child"[MeSH Terms] OR "infant"[MeSH Terms] OR "pediatrics"[MeSH Terms]) AND ("Hirschsprung Disease"[MeSH Terms] OR (("hirschprung"[Title/Abstract] OR "hirschsprung*"[Title/Abstract] OR "hirschsprung's"[Title/Abstract]) AND "Disease"[Title/Abstract]) OR (("congenital"[Title/Abstract] AND "megacolon"[Title/Abstract]) OR "congenital megacolon"[Title/Abstract]) OR "Aganglionosis"[Title/Abstract]) AND ("laparoscopy"[MeSH Terms] OR "laparoscop*"[Title/Abstract] OR ("colectomy"[MeSH Terms] OR "colectom*"[Title/Abstract]) OR ("anastomosis, surgical"[MeSH Terms] OR ("anastomosis"[Title/Abstract] AND "surgical"[Title/Abstract])) OR "megacolon/surgery"[MeSH Terms] OR "hirschsprung disease/surgery"[MeSH Terms] OR ("pull-through"[Title/Abstract] OR "pullthrough"[Title/Abstract]) OR ("soave"[Title/Abstract] OR "soave's"[Title/Abstract]) OR ("swenson"[Title/Abstract] OR "swenson's"[Title/Abstract]) OR ("duhamel"[Title/Abstract] OR "duhamel's"[Title/Abstract]) OR ("boley"[Title/Abstract] OR "soave-boley"[Title/Abstract]))

Translation to Ovid MEDLINE(R)

(("child*" or "stepchild*" or "step child*" or "kid" or "kids" or "girl" or "girls" or "boy" or "boys" or "boyhood" or "youngster*" or "toddler*" or "preschool*" or "pre school*" or "kindergarten*" or "juvenil*" or "minors" or "minors*" or "pediatric*" or "paediatric*" or "PICU" or "baby" or "baby*" or "babies" or "neonat*" or "neo nat*" or "perinat*" or "peri nat*" or "newborn*" or "new born*" or "infan*" or "premature*" or "preterm*").ti,ab,oa,kw,kf. or exp child/ or exp infant/ or exp pediatrics/) and (exp Hirschsprung Disease/ or (("hirschprung" or "hirschsprung*" or "hirschsprung's") and "Disease").ti,ab,oa,kw,kf. or (("congenital" and "megacolon") or "congenital megacolon").ti,ab,oa,kw,kf. or "Aganglionosis".ti,ab,oa,kw,kf.) and (exp laparoscopy/ or "laparoscop*".ti,ab,oa,kw,kf. or (exp colectomy/ or "colectom*".ti,ab,oa,kw,kf.) or (expanastomosis, surgical/ or ("anastomosis" and "surgical").ti,ab,oa,kw,kf.) or exp megacolon/su or exp hirschsprung disease/su or ("pull-through" or "pullthrough").ti,ab,oa,kw,kf. or ("soave" or "soave's").ti,ab,oa,kw,kf. or ("swenson" or "swenson's").ti,ab,oa,kw,kf. or ("duhamel" or "duhamel's").ti,ab,oa,kw,kf. or ("boley" or "soave-boley").ti,ab,oa,kw,kf.)

Translation to Embase 1974 to 2022

(("child*" or "stepchild*" or "step child*" or "kid" or "kids" or "girl"or "girls" or "boy" or "boys" or "boyhood" or "youngster*" or "toddler*" or "preschool*" or "pre school*" or "kindergarten*" or "juvenil*" or "minors" or "minors*" or "pediatric*" or "paediatric*" or "PICU" or "baby" or "baby*" or "babies" or "neonat*" or"neo nat*" or "perinat*" or "peri nat*" or "newborn*" or "new born*" or "infan*" or "premature*" or "preterm*").ab,ga,kw,od,ot,ti. or exp child/ or exp infant/ or exp pediatrics/) and (exp Hirschsprung Disease/ or (("hirschprung" or "hirschsprung*" or "hirschsprung's") and "Disease").ab,ga,kw,od,ot,ti. or (("congenital" and "megacolon") or "congenital megacolon").ab,ga,kw,od,ot,ti. or "Aganglionosis".ab,ga,kw,od,ot,ti.) and (exp laparoscopy/ or "laparoscop*".ab,ga,kw,od,ot,ti. or (exp colectomy/ or "colectom*".ab,ga,kw,od,ot,ti.) or (exp anastomosis/ or ("anastomosis" and "surgical").ab,ga,kw,od,ot,ti.) or exp megacolon/su or exp hirschsprung disease/su or ("pull-through" or "pullthrough").ab,ga,kw,od,ot,ti. or ("soave" or "soave's").ab,ga,kw,od,ot,ti. or ("swenson" or "swenson's").ab,ga,kw,od,ot,ti. or ("duhamel" or "duhamel's").ab,ga,kw,od,ot,ti. or ("boley" or "soave-boley").ab,ga,kw,od,ot,ti.)

Translation to Scopus

TITLE-ABS-KEY("child*" or "stepchild*" or "stepchild*" or "kid" or "kids" or "girl" or "girls" or "boy" or "boys" or "boyhood" or "youngster*" or "toddler*" or "preschool*" or "pre school*" or "kindergarten*" or "juvenil*" or "minors" or "minors*" or "pediatric*" or "paediatric*" or "PICU" or "baby" or "baby*" or "babies" or "neonat*" or "neo nat*" or "perinat*" or "peri nat*" or "newborn*" or "new born*" or "infan*" or "premature*" or "preterm*")

AND TITLE-ABS-KEY(("hirschprung" or "hirschsprung*" or "hirschsprung's") and "Disease") OR TITLE-ABS-KEY (("congenital" and "megacolon") or "congenital megacolon") OR TITLE-ABS-KEY(Aganglionosis)

AND TITLE-ABS-KEY ( "laparoscop*" ) OR TITLE-ABS-KEY ( "colectom*" ) OR TITLE-ABS-KEY ( "anastomosis" AND "surgical" ) OR TITLE-ABS-KEY ( “megacolon” AND “surgery” ) OR TITLE-ABS-KEY ( ( ( "hirschprung" OR "hirschsprung*" OR "hirschsprung's" ) AND "Disease" ) AND surgery ) OR TITLE-ABS-KEY ( "pull-through" OR "pullthrough" ) OR TITLE-ABS-KEY ( "soave" OR "soave's" ) OR TITLE-ABS-KEY ("swenson" OR "swenson's" ) OR TITLE-ABS-KEY ( "duhamel" OR "duhamel's" ) OR TITLE-ABS-KEY ( "boley" OR "soave-boley" )

Translation to CINAHL (EBSCOhost)

(TI("child*" OR "stepchild*" OR "step child*"OR "kid" OR "kids" OR "girl" OR "girls" OR "boy" OR "boys" OR "boyhood" OR "youngster*" OR "toddler*" OR "preschool*" OR "pre school*" OR "kindergarten*" OR "juvenil*" OR "minors" OR "minors*" OR "pediatric*" OR "paediatric*" OR "PICU" OR "baby" OR "baby*" OR "babies" OR "neonat*" OR "neo nat*" OR "perinat*" OR "peri nat*" OR "newborn*" OR "new born*" OR "infan*" OR "premature*" OR "preterm*") OR AB("child*" OR "stepchild*" OR "step child*"OR "kid" OR "kids" OR "girl" OR "girls" OR "boy" OR "boys" OR "boyhood" OR "youngster*" OR "toddler*" OR "preschool*" OR "pre school*" OR "kindergarten*" OR "juvenil*" OR "minors" OR "minors*" OR "pediatric*" OR "paediatric*" OR "PICU" OR "baby" OR "baby*" OR "babies" OR "neonat*" OR "neo nat*" OR "perinat*" OR "peri nat*" OR "newborn*" OR "new born*" OR "infan*" OR "premature*" OR "preterm*")OR (MH "Child+") OR (MH "Infant+") OR (MH "Pediatrics+"))AND ((MH "Hirschsprung Disease+") OR TI(("hirschprung" OR "hirschsprung*" OR "hirschsprung's") AND "Disease") OR AB (("hirschprung"OR "hirschsprung*" OR "hirschsprung's") AND "Disease") OR TI(("congenital" AND "megacolon") OR "congenital megacolon") OR AB(("congenital" AND "megacolon") OR "congenital megacolon") OR TI"Aganglionosis" OR AB "Aganglionosis") AND ((MH "Laparoscopy") OR(TI"laparoscop*" OR AB"laparoscop*") OR (MH "Colectomy+") OR (TI"colectom*" OR AB"colectom*") OR (MH "Anastomosis, Surgical+") OR (TI"anastomosis" AND "surgical") OR (AB anastomosis" AND "surgical") OR (MH "Megacolon+/SU") OR

(MH "Hirschsprung Disease+/SU") OR TI("pull-through" OR "pullthrough") OR AB(pull-through" OR "pullthrough") OR TI("soave" OR "soave's") OR AB ("soave" OR "soave's") OR TI("swenson" OR "swenson's") OR AB("swenson" OR "swenson's") OR TI("duhamel" OR "duhamel's") OR AB("duhamel" OR "duhamel's") OR TI("boley" OR "soave-boley") OR AB ("boley" OR "soave-boley"))

Translation to Web of Science Core Collection (1900-present) Indexes=SCI-EXPANDED, SSCI, A&HCI, CPCI-S, CPCI-SSH, BKCI-S, BKCI-SSH, ESCI, CCR-EXPANDED, IC Timespan=All years

(TS=("child*" or "stepchild*" or "step child*" or "kid" or "kids" or "girl" or "girls" or "boy" or "boys" or "boyhood" or "youngster*" or "toddler*" or "preschool*" or "pre school*" or "kindergarten*" or "juvenil*" or "minors"or "minors*" or "pediatric*" or "paediatric*" or "PICU" or "baby" or "baby*" or "babies" or "neonat*" or "neo nat*" or "perinat*" or "peri nat*" or "newborn*" or "new born*" or "infan*" or "premature*" or "preterm*"))AND(TS=(("hirschprung" or "hirschsprung*" or "hirschsprung's") and "Disease") OR TS=(("congenital" and "megacolon") or "congenital megacolon") OR TS=(Aganglionosis))AND(TS=("laparoscop*" ) OR TS=( "colectom*" ) OR TS=( "anastomosis" AND "surgical" ) OR TS=( “megacolon” AND “surgery” ) OR TS= ( ( ( "hirschprung" OR "hirschsprung*" OR "hirschsprung's" ) AND "Disease" ) AND surgery ) OR TS=( "pull-through" OR "pullthrough" ) OR TS=( "soave" OR "soave's" ) OR TS=( "swenson" OR "swenson's" ) OR TS=( "duhamel" OR "duhamel's" ) OR TS=( "boley" OR "soave-boley" ))

Translation to Google Scholar

pediatric hirschsprung disease "pull through"

Further reduced by hand searching those that were not duplicates

Searched ClinicalTrials.gov

27 Studies found for: surgery | Hirschsprung Disease | Child

Also searched for Surgical.

Applied Filters: Child (birth–17)

https://www.clinicaltrials.gov/ct2/results?cond=Hirschsprung+Disease&term=surgery&cntry=&state=&city=&dist=&Search=Search&flds=abdeijvyz&age=0

Searched WHO Trial Registry at https://apps.who.int/trialsearch/

Updated WHO Trial Registry
